# Supplementary material for: Prevalence of osteoporosis in patients with nephrolithiasis and vice versa: a cumulative analysis
Source: Front Endocrinol (Lausanne). 2023 Jul 4;14:1180183. doi: 10.3389/fendo.2023.1180183 (PMC10352837; doi:10.3389/fendo.2023.1180183)
Supplement: Supplementary Table 2 — Newcastle-Ottawa Scale assessment of the quality of the case-control and cohort studies. [file Table_2.doc]

| Study | Selection | | | | Comparability | | Exposure/Outcome | | | Total scores |
| --- | --- | --- | --- | --- | --- | --- | --- | --- | --- | --- |
| 1 | 2 | 3 | 4 | 5 | 6 | 7 | 8 | 9 |
| Cvijetic et al (2002) | Yes | Yes | Yes | Yes | Yes | No | No | Yes | No | 6 |
| Arrabal-Polo et al (2012) | Yes | Yes | Yes | Yes | Yes | Yes | No | No | No | 6 |
| Bijelic et al (2014) | Yes | Yes | Yes | Yes | Yes | Yes | Yes | No | No | 7 |
| Shavit et al (2015) | Yes | Yes | Yes | Yes | Yes | Yes | Yes | No | No | 6 |
| Lu et al (2020) | Yes | Yes | Yes | Yes | Yes | Yes | Yes | Yes | Yes | 9 |
| Kim et al (2022) | Yes | Yes | Yes | Yes | Yes | Yes | Yes | No | No | 7 |
| Keller et al (2013) | Yes | Yes | Yes | Yes | Yes | Yes | Yes | No | No | 7 |
| Chou et al (2014) | Yes | Yes | Yes | Yes | Yes | Yes | Yes | Yes | Yes | 9 |
| Rendina et al (2021) | Yes | Yes | Yes | Yes | Yes | Yes | Yes | No | No | 7 |

Supplementary Table 2. Newcastle-Ottawa Scale assessment of the quality of the case-control and cohort studies.

NOTE: 1. indicates that the exposed cohort was representative of the population; 2. Indicates that the non-exposed cohort was drawn from the same population; 3. Indicates that the exposure ascertainment was from secure records or a structured interview; 4. Indicates that outcome of interest was not present at start of study; 5. Indicates that the cohorts were comparable for age and sex; 6. Indicates that the cohorts were comparable on all additional factor(s) reported; 7. Indicates that outcome was assessed from a secure record; 8. Indicates that follow-up was long enough for outcomes to occur; 9. Indicates that follow-up was complete.
